# Supplementary material
Source: PubMed Central journal article supplement (PMC153056)
Supplement: pnas_0730776100_4.pdf [file pnas_0730776100_4.pdf]

□  $\text{Plasma\_Albumin}(t) = \text{Plasma\_Albumin}(t - dt) + \text{Albumin\_Supply} + \text{Albumin\_Return} - \text{Catabolic\_Degradation} - \text{Albumin\_Crossing\_GBM}) * dt$

INIT Plasma\_Albumin = 1

INFLOWS:

→  $\text{Albumin\_Supply} = \text{LiverSynthesis}$

→  $\text{Albumin\_Return} = \text{Tubular\_Albumin} * \text{Fractional\_Albumin\_Return}$

OUTFLOWS:

→  $\text{Catabolic\_Degradation} = \text{Plasma\_Albumin} * \text{CatabolicRate}$

→  $\text{Albumin\_Crossing\_GBM} = \text{Plasma\_Albumin} * (\text{D\_Alb\_in\_GBM} / \text{Thickness\_of\_GBM})$

□  $\text{ProxTub\_Fluid}(t) = \text{ProxTub\_Fluid}(t - dt) + (\text{GFR} - \text{Water\_Reabsorption\_}\&\_ \text{Excretion}) * dt$

INIT ProxTubFluid\_ = 1

INFLOWS:

→  $\text{GFR} = \text{SD\_Length} * \text{Transglomerular\_Pressure} * 4$

OUTFLOWS:

→  $\text{Water\_Reabsorption\_}\&\_ \text{Excretion} = \text{ProxTub\_Fluid}_ * 1$

□  $\text{Tubular\_Albumin}(t) = \text{Tubular\_Albumin}(t - dt) + (\text{Albumin\_Crossing\_GBM} - \text{Albumin\_Return} - \text{Albumin\_Excretion} - \text{Albumin\_Degradation}) * dt$

INIT Tubular\_Albumin = 1

INFLOWS:

→  $\text{Albumin\_Crossing\_GBM} = \text{Plasma\_Albumin} * (\text{D\_Alb\_in\_GBM} / \text{Thickness\_of\_GBM})$

OUTFLOWS:

→  $\text{Albumin\_Return} = \text{Tubular\_Albumin} * \text{Fractional\_Albumin\_Return}$

→  $\text{Albumin\_Excretion} = \text{Tubular\_Albumin} - \text{Albumin\_Return} - \text{Albumin\_Degradation}$

→  $\text{Albumin\_Degradation} = (\text{Tubular\_Albumin} - \text{Albumin\_Return}) * \text{Fractional\_Albumin\_Degradation}$

○  $\text{Albumin\_Concentration\_ProxTub} = \text{Tubular\_Albumin} / \text{ProxTub\_Fluid}_$

○  $\text{CatabolicRate} = 0.9$       ○  $\text{D\_Alb\_in\_GBM} = 5$       ○  $\text{Liver\_Synthesis} = 1$

○  $\text{SD\_Length} = 1$       ○  $\text{Thickness\_of\_GBM} = 1$       ○  $\text{Transglomerular\_Pressure} = 1$

Fractional\_Albumin\_Return = GRAPH(Albumin\_Concentration\_ProxTub)

(0.00, 1.00), (2.00, 1.00), (4.00, 0.7), (6.00, 0.4), (8.00, 0.1), (10.00, 0.1), (12.00, 0.1), (14.00, 0.1), (16.00, 0.1), (18.00, 0.1) (20.00, 0.1)

Fractional\_Albumin\_Degradation\_ = GRAPH(Albumin\_Concentration\_ProxTub)

(0.00, 1.00), (2.70, 1.00), (5.40, 0.7), (8.10, 0.4), (10.8, 0.1), (13.5, 0.1), (16.2, 0.1), (18.9, 0.1), (21.6, 0.1), (24.3, 0.1) (27.00, 0.1)
