# Supplementary material
Source: PubMed Central journal article supplement (PMC153056)

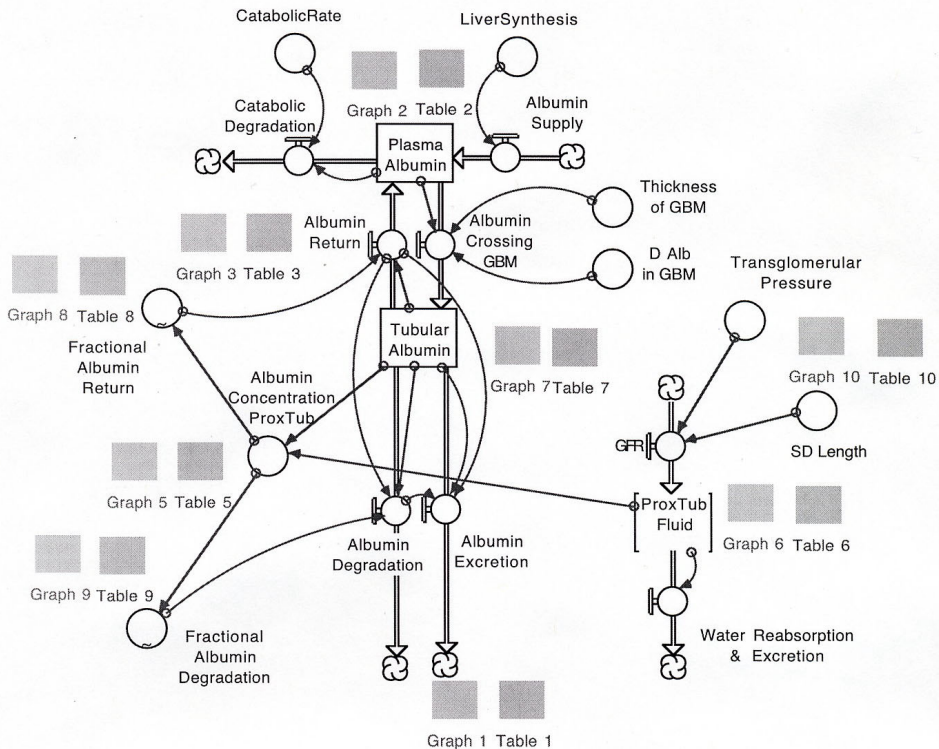

Supplement: pnas_0730776100_2.pdf [file pnas_0730776100_2.pdf]
